# Supplementary material for: Computational Assessment of Substituted 2-Mercaptobenzimidazole Schiff Bases Derivatives Targeting α-Amylase, α-Glucosidase, and PPAR-γ Receptor in Type 2 Diabetes Mellitus
Source: Research Square preprint supplement (doi:10.21203/rs.3.rs-6892367/v1), 2025-07-14
Supplement: Supplementary file 1 [file e85513ac8930fe7d17f334be.docx]

**Graphical abstract:**

**Molecular Docking**


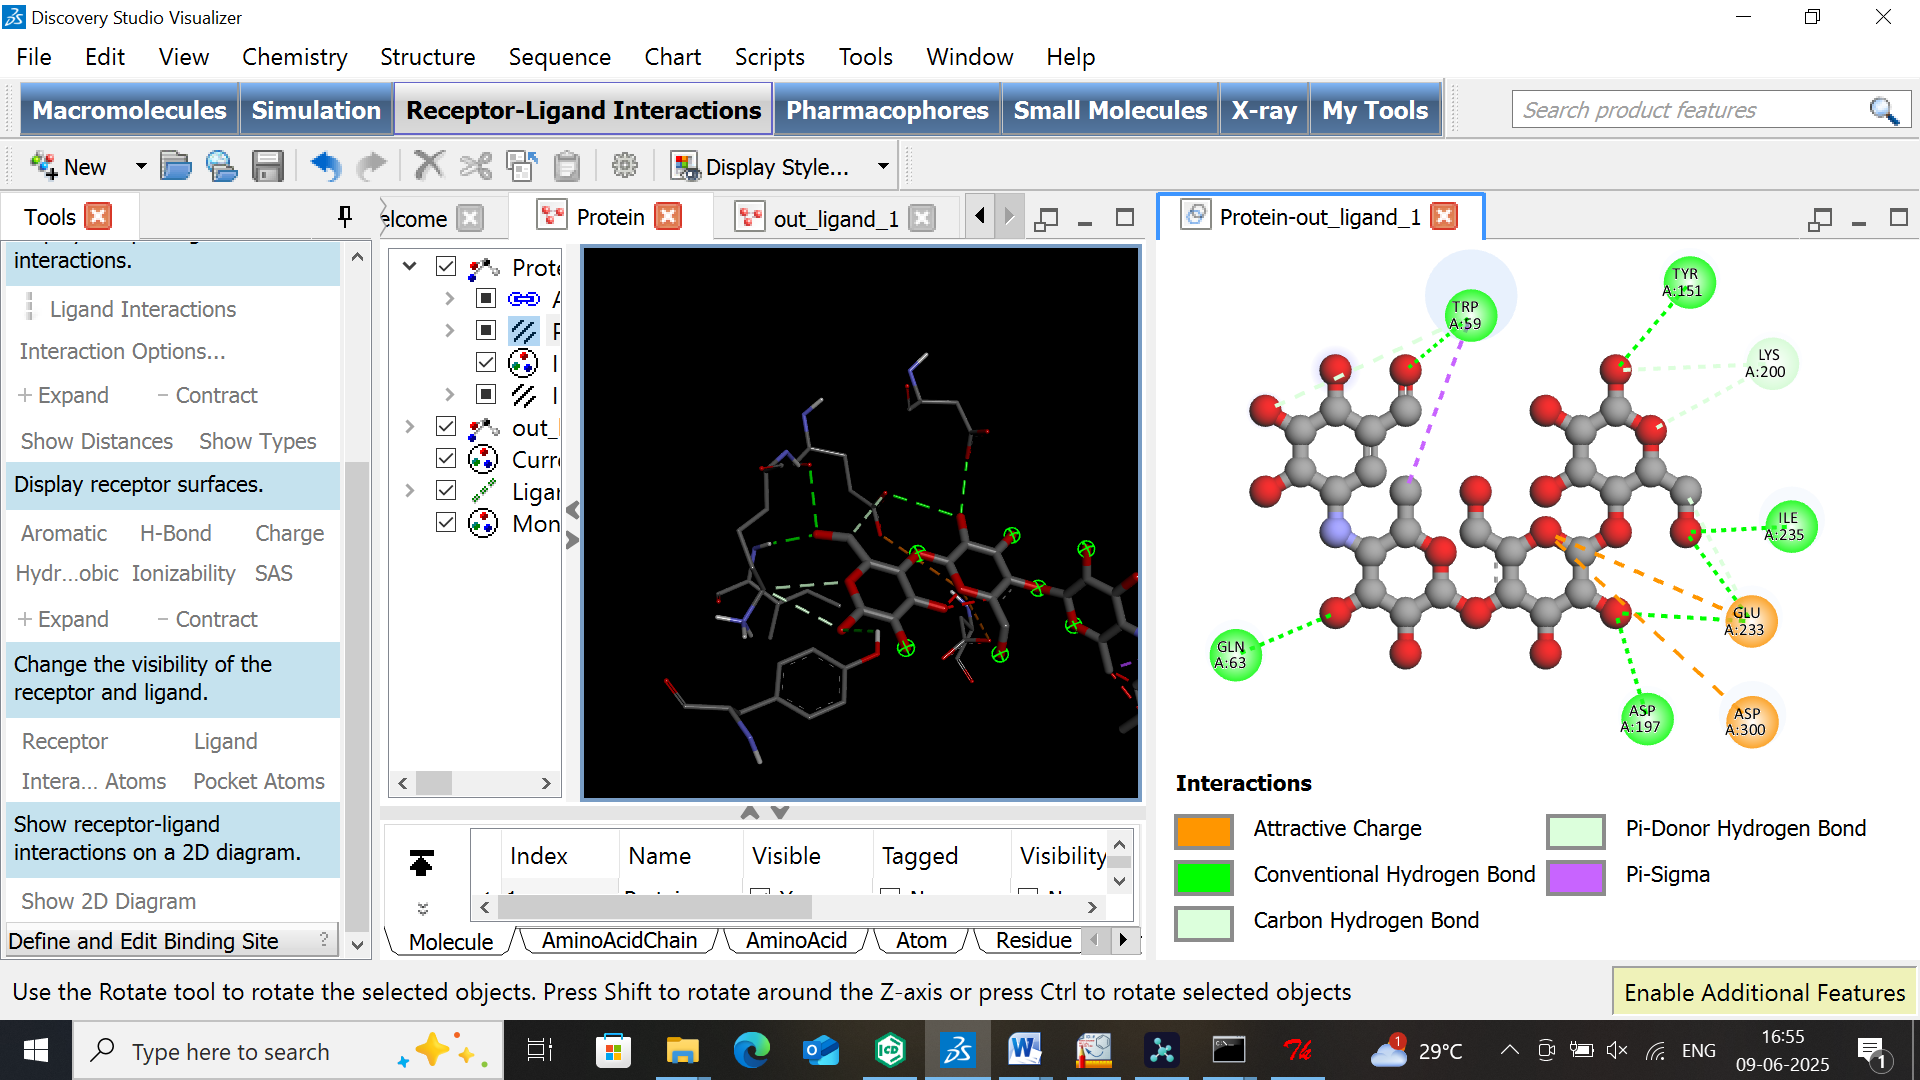


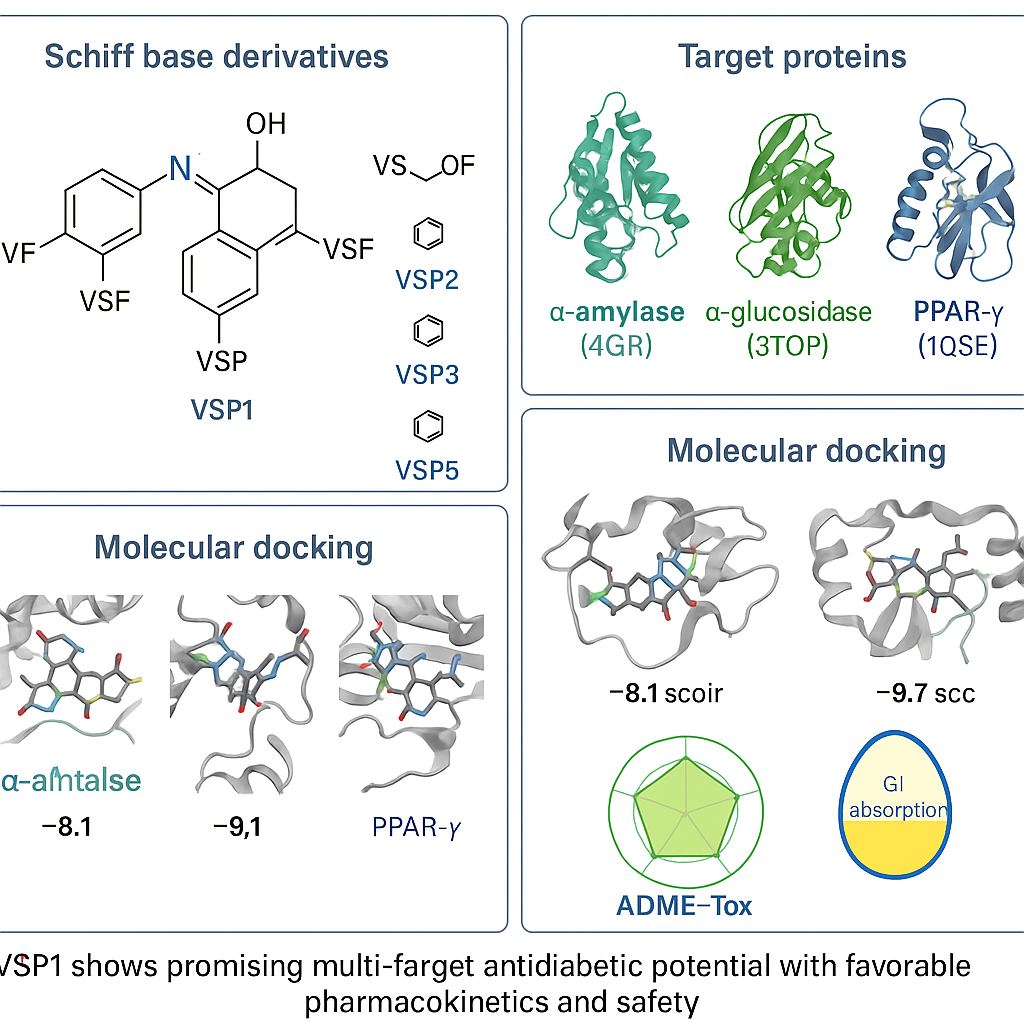


**Ligand**


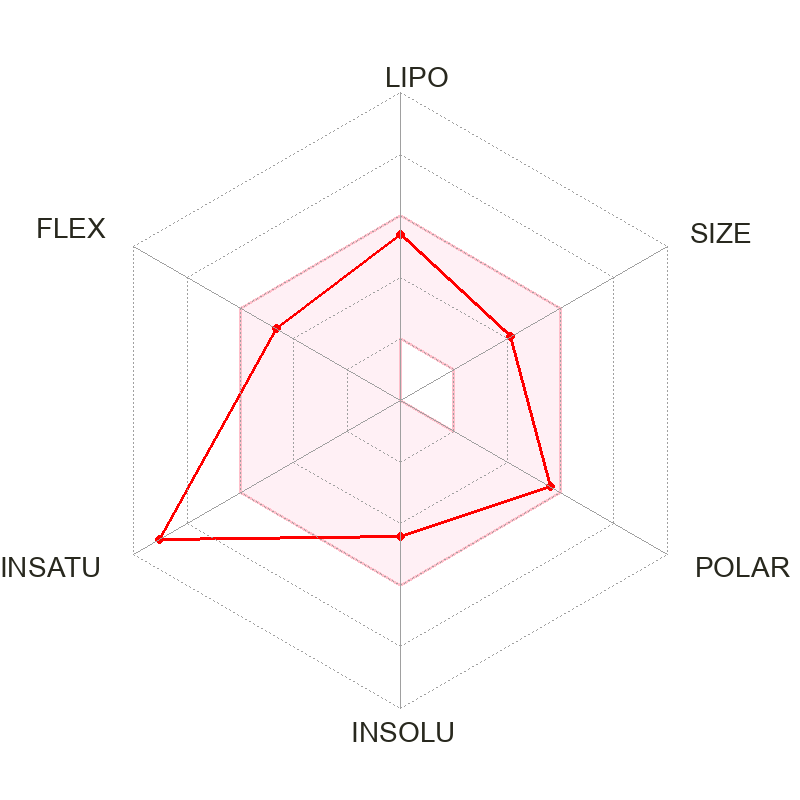


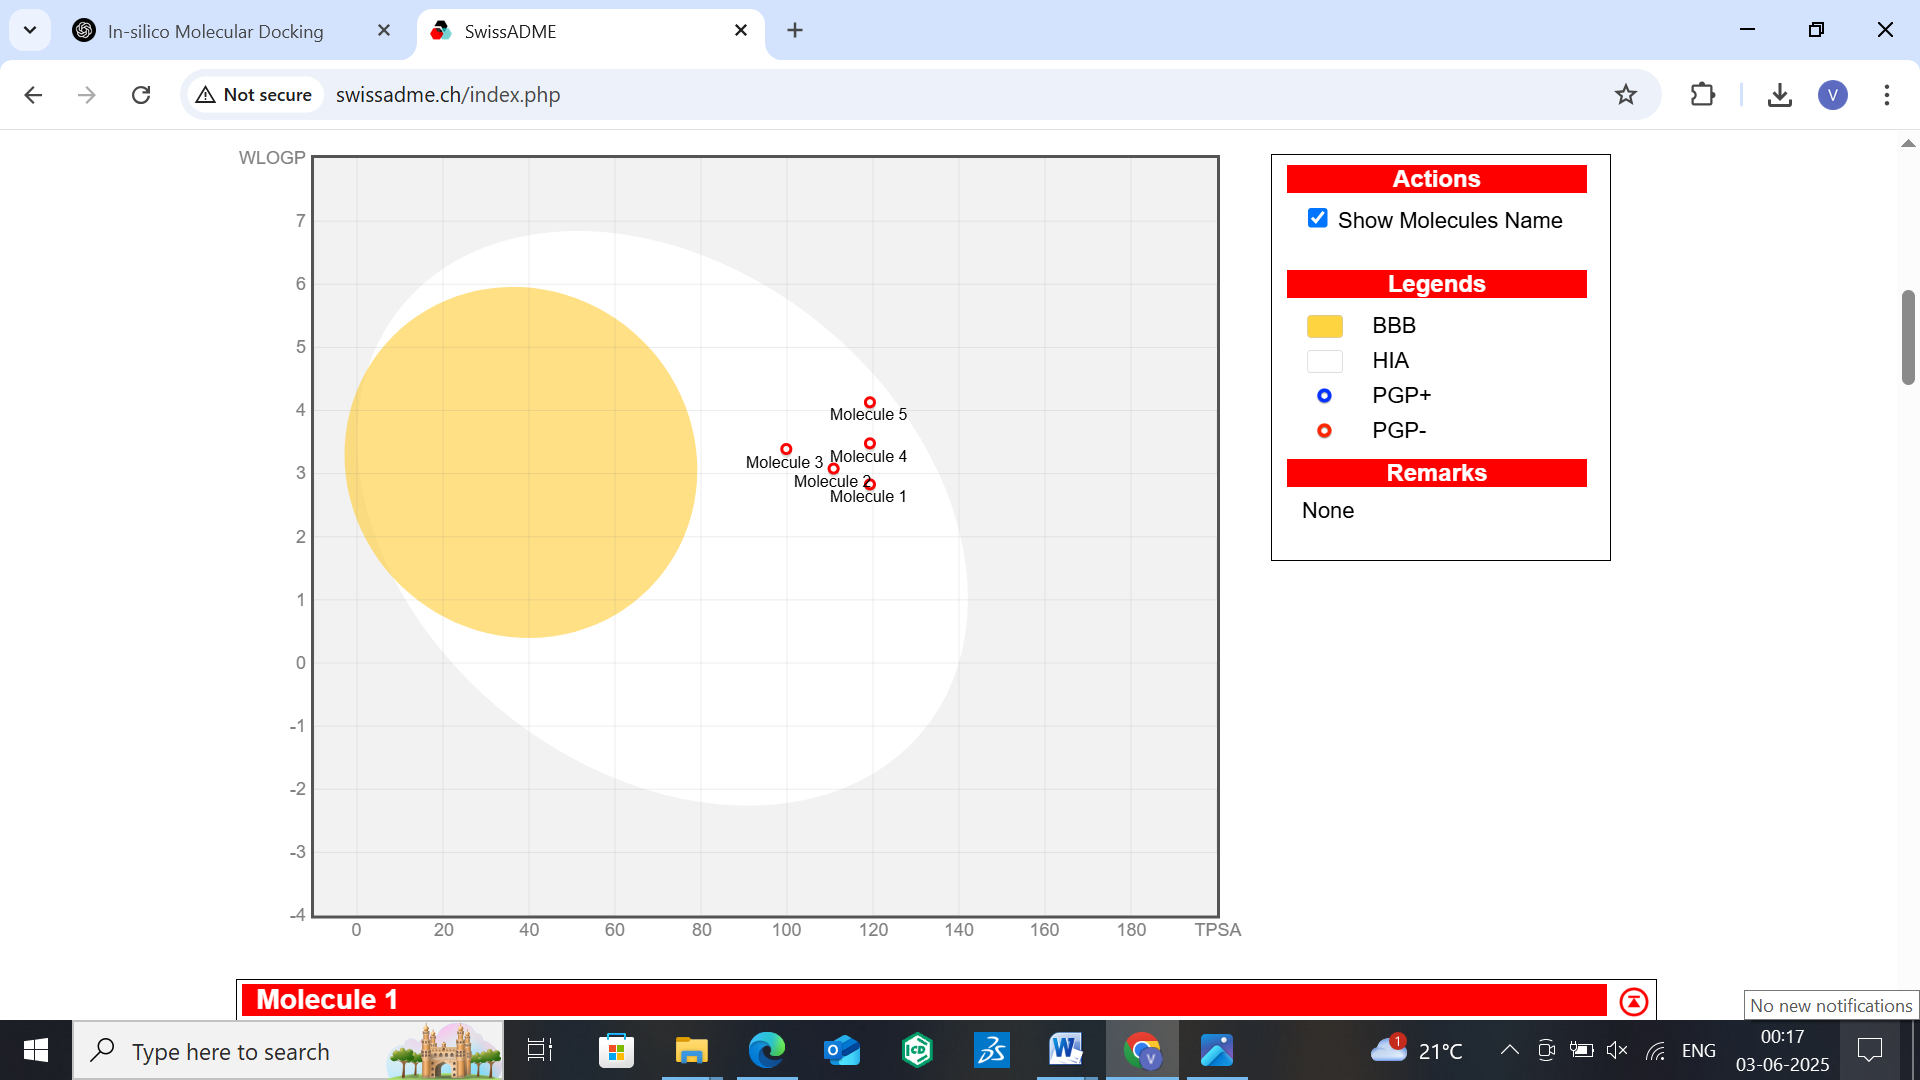


**Designed 2-Mercaptobenzimidazole**

**Schiff base derivatives**

**ADMET Analysis**

**Boiled egg plot**

**Lipinski Analysis**
